# Supplementary material for: Profiling of Lymphovascular Space Invasion in Cervical Cancer Revealed PI3K/Akt Signaling Pathway Overactivation and Heterogenic Tumor-Immune Microenvironments
Source: MDPI journal article supplement (doi:10.3390/life13122342), 2023-12-14
Supplement: s1 [file s1]

| <b>Immune Marker</b>   | <b>Point-biserial Correlation</b> |
|------------------------|-----------------------------------|
| Regulatory Tcell (Treg | -0.5025989                        |
| Eosinophil             | -0.3515399                        |
| T cell CD8+ Naïve cell | 0.3615544                         |

Supplement S3. Point-biserial correlation which calculates correlation between numeric variables (expression of Immune cell marker of xCELL) and categorical variable (LVSI) was calculated.
