# Supplementary material for: Profiling of Lymphovascular Space Invasion in Cervical Cancer Revealed PI3K/Akt Signaling Pathway Overactivation and Heterogenic Tumor-Immune Microenvironments
Source: Life (Basel). 2023 Dec 14;13(12):2342. doi: 10.3390/life13122342 (PMC10744523; doi:10.3390/life13122342)
Supplement: Supplementary file 1 [file life-13-02342-s001.zip › Supplement S1_LVSI_DEG_log2FCAdjustedPvalue.csv]

GENEID	SYMBOL	log2FoldChange	padj
ENSG00000003249	DBNDD1	6.805216743	0.039445062
ENSG00000004961	HCCS	4.834122293	0.014776233
ENSG00000005436	GCFC2	2.675667223	0.028678045
ENSG00000006194	ZNF263	2.892634028	0.037202675
ENSG00000007314	SCN4A	7.91333176	0.00456398
ENSG00000007372	PAX6	5.635814247	0.016174932
ENSG00000008056	SYN1	6.960447885	0.006625455
ENSG00000011083	SLC6A7	7.090330008	0.043194715
ENSG00000011638	TMEM159	4.637506954	0.00958321
ENSG00000014138	POLA2	2.753660353	0.027966022
ENSG00000026751	SLAMF7	4.291397849	0.020375716
ENSG00000028277	POU2F2	5.44534803	0.002343416
ENSG00000029639	TFB1M	4.917653111	0.014661069
ENSG00000030110	BAK1	4.506296574	0.004539801
ENSG00000036530	CYP46A1	6.787026233	0.028450909
ENSG00000040608	RTN4R	6.573937427	0.005798469
ENSG00000047662	FAM184B	7.419292186	0.016003115
ENSG00000050730	TNIP3	6.991911657	0.000163672
ENSG00000051180	RAD51	5.083814853	0.0192096
ENSG00000053702	NRIP2	7.626014746	0.001148344
ENSG00000054179	ENTPD2	7.371290047	0.028452948
ENSG00000066855	MTFR1	3.902743649	0.006626136
ENSG00000067177	PHKA1	2.997334788	0.017175576
ENSG00000067715	SYT1	5.703624259	0.016174932
ENSG00000070808	CAMK2A	4.591251601	0.044916522
ENSG00000073861	TBX21	6.086375367	0.021564644
ENSG00000074276	CDHR2	6.525009109	0.007696203
ENSG00000074706	IPCEF1	6.288234631	0.017518147
ENSG00000075131	TIPIN	4.734706206	0.007913524
ENSG00000075461	CACNG4	7.933550759	0.021136438
ENSG00000077080	ACTL6B	6.517596255	0.026335241
ENSG00000077152	UBE2T	8.675383668	8.22E-06
ENSG00000077274	CAPN6	7.957937307	0.012300433
ENSG00000077713	SLC25A43	3.391915788	0.017227001
ENSG00000077984	CST7	5.438428405	0.045436637
ENSG00000078237	TIGAR	5.197400245	0.008064132
ENSG00000078579	FGF20	21.12643144	2.82E-08
ENSG00000080007	DDX43	6.707398591	0.033790322
ENSG00000083457	ITGAE	3.280653723	0.028177012
ENSG00000084674	APOB	6.52174679	0.003426036
ENSG00000085999	RAD54L	4.67336414	0.009154393
ENSG00000086967	MYBPC2	7.581689551	0.020488751
ENSG00000087128	TMPRSS11E	20.56010336	1.53E-09
ENSG00000087237	CETP	22.90675795	3.22E-10
ENSG00000089225	TBX5	8.91088676	0.004871476
ENSG00000089505	CMTM1	7.394328681	0.025589323
ENSG00000091128	LAMB4	8.995439702	0.014601376
ENSG00000092054	MYH7	7.151125179	0.007070001
ENSG00000092200	RPGRIP1	7.420032645	0.006692491
ENSG00000092607	TBX15	7.895308883	0.013047336
ENSG00000095713	CRTAC1	5.64189268	0.040777869
ENSG00000099822	HCN2	20.50913709	1.84E-09
ENSG00000100060	MFNG	4.612177806	0.034450007
ENSG00000100162	CENPM	7.422123407	0.01121468
ENSG00000100209	HSCB	6.277753416	0.007288964
ENSG00000100583	SAMD15	8.359356166	0.005859406
ENSG00000101189	MRGBP	4.886835604	0.030506052
ENSG00000101204	CHRNA4	24.21856778	1.85E-17
ENSG00000101306	MYLK2	21.9098373	6.44E-09
ENSG00000101323	HAO1	20.5758828	6.75E-08
ENSG00000101850	GPR143	22.11783811	9.53E-16
ENSG00000101945	SUV39H1	5.868963929	0.018054779
ENSG00000102043	MTMR8	4.842491244	0.011470067
ENSG00000102387	TAF7L	8.174226669	0.037714301
ENSG00000103569	AQP9	5.078405273	0.020262035
ENSG00000103995	CEP152	3.105552689	0.031907246
ENSG00000104044	OCA2	22.27683436	8.58E-13
ENSG00000104205	SGK3	5.532153518	0.047063768
ENSG00000104213	PDGFRL	6.202349491	0.02756419
ENSG00000104228	TRIM35	3.602580246	0.007587718
ENSG00000104899	AMH	7.226537238	0.000962261
ENSG00000104941	RSPH6A	7.533713035	0.005859406
ENSG00000105198	LGALS13	19.64459049	3.62E-07
ENSG00000105370	LIM2	20.56229688	9.24E-09
ENSG00000105865	DUS4L	3.72039899	0.044727028
ENSG00000105929	ATP6V0A4	23.31481508	5.64E-16
ENSG00000105991	HOXA1	7.834129477	0.003333923
ENSG00000106327	TFR2	7.975270706	2.96E-05
ENSG00000106780	MEGF9	4.136121566	0.034620172
ENSG00000106829	TLE4	2.244430702	0.001899963
ENSG00000107159	CA9	23.61913885	2.64E-13
ENSG00000107833	NPM3	8.518182731	0.000242753
ENSG00000109066	TMEM104	3.353938091	0.042268489
ENSG00000109101	FOXN1	7.291401292	0.007587718
ENSG00000109424	UCP1	21.67790013	1.98E-09
ENSG00000109534	GAR1	4.488729065	0.02873478
ENSG00000109586	GALNT7	2.823908533	0.006908766
ENSG00000109805	NCAPG	2.535783788	0.034227362
ENSG00000110484	SCGB2A2	20.71410461	2.61E-09
ENSG00000110660	SLC35F2	4.697564276	0.019712222
ENSG00000110665	C11orf21	8.220308483	0.00370522
ENSG00000110887	DAO	9.188965173	0.006784074
ENSG00000110900	TSPAN11	6.535425673	0.045942546
ENSG00000111046	MYF6	22.76630176	1.40E-09
ENSG00000111181	SLC6A12	6.979582423	0.022123807
ENSG00000111713	GYS2	9.142928251	0.001556659
ENSG00000111788	RP11-22B23.1	2.520423562	0.035633756
ENSG00000112038	OPRM1	21.14290794	2.75E-08
ENSG00000112041	TULP1	7.769014093	0.007963435
ENSG00000112167	SAYSD1	6.981435772	0.02873478
ENSG00000112280	COL9A1	8.911310046	0.044138625
ENSG00000112584	FAM120B	4.231602277	0.032877705
ENSG00000112667	DNPH1	5.735035057	0.003666099
ENSG00000113119	TMCO6	3.673066718	0.049922343
ENSG00000113212	PCDHB7	7.463038984	0.025084186
ENSG00000114251	WNT5A	3.727613298	0.00533765
ENSG00000114268	PFKFB4	4.546225384	0.01680095
ENSG00000115155	OTOF	6.857809875	0.009232953
ENSG00000115607	IL18RAP	7.711301369	0.004757077
ENSG00000116147	TNR	6.279379815	0.037833235
ENSG00000116254	CHD5	5.210777619	0.016790697
ENSG00000117016	RIMS3	6.573672391	0.031907246
ENSG00000117069	ST6GALNAC5	6.912993264	0.021561978
ENSG00000117154	IGSF21	7.778233873	0.033077989
ENSG00000117322	CR2	8.399780778	0.008496874
ENSG00000117601	SERPINC1	22.06183852	4.53E-13
ENSG00000117971	CHRNB4	22.42366368	4.07E-16
ENSG00000118160	SLC8A2	6.240379258	0.003305541
ENSG00000118939	UCHL3	7.719947478	3.39E-05
ENSG00000118965	WDR35	2.334161735	0.02682855
ENSG00000119121	TRPM6	3.952691296	0.041403667
ENSG00000119411	BSPRY	9.491187032	1.38E-07
ENSG00000119703	ZC2HC1C	8.11169887	0.005246467
ENSG00000120332	TNN	8.107872841	0.000303992
ENSG00000120500	ARR3	19.60027359	3.92E-07
ENSG00000120656	TAF12	4.445331642	0.00250007
ENSG00000120729	MYOT	8.332047845	0.003551779
ENSG00000121270	ABCC11	6.985490862	0.022552123
ENSG00000121851	POLR3GL	4.494514263	0.002245893
ENSG00000121903	ZSCAN20	5.099725778	0.00143233
ENSG00000122490	PQLC1	5.439173967	0.000962261
ENSG00000122873	CISD1	5.789924451	0.027661114
ENSG00000123395	ATG101	5.86520339	0.005284529
ENSG00000123427	METTL21B	5.567689665	0.001765115
ENSG00000123612	ACVR1C	5.599408398	0.011701833
ENSG00000123870	ZNF137P	7.545972252	0.00017459
ENSG00000123999	INHA	21.49280676	3.13E-10
ENSG00000124279	FASTKD3	3.952920283	0.003572581
ENSG00000124613	ZNF391	7.906510992	0.011559532
ENSG00000124641	MED20	4.668241621	0.013429149
ENSG00000124802	EEF1E1	6.202122445	0.016208642
ENSG00000125378	BMP4	5.318322752	0.040236228
ENSG00000125898	FAM110A	7.598553612	0.000417021
ENSG00000126259	KIRREL2	21.7844858	1.51E-12
ENSG00000126353	CCR7	6.242529891	0.00423713
ENSG00000126759	CFP	4.925366501	0.028541017
ENSG00000126856	PRDM7	6.025241072	0.014661069
ENSG00000126878	AIF1L	4.938953788	0.030506052
ENSG00000127084	FGD3	3.62556637	0.000926845
ENSG00000127578	WFIKKN1	6.693633189	0.006232827
ENSG00000128694	OSGEPL1	7.219800941	0.000821681
ENSG00000129194	SOX15	8.299651908	8.68E-05
ENSG00000129450	SIGLEC9	6.204848505	0.007434353
ENSG00000129988	LBP	8.015786411	0.032162035
ENSG00000129991	TNNI3	22.026458	5.19E-09
ENSG00000130193	THEM6	8.028431005	0.006758283
ENSG00000130348	QRSL1	4.074535401	0.02846277
ENSG00000130948	HSD17B3	7.56349911	0.012319211
ENSG00000131187	F12	6.745945399	0.004704509
ENSG00000131401	NAPSB	6.51857964	0.021877516
ENSG00000132004	FBXW9	7.493766688	0.000393573
ENSG00000132681	ATP1A4	8.983522981	0.000164881
ENSG00000132746	ALDH3B2	6.834350859	0.016003115
ENSG00000132763	MMACHC	6.677581557	0.037380171
ENSG00000132915	PDE6A	4.524449364	0.029492072
ENSG00000133020	MYH8	9.213389855	7.29E-05
ENSG00000133561	GIMAP6	7.104118727	2.27E-05
ENSG00000133636	NTS	20.9933017	3.44E-08
ENSG00000133678	TMEM254	7.830897219	4.48E-07
ENSG00000134042	MRO	21.27880202	1.47E-09
ENSG00000134061	CD180	5.946814931	0.012231134
ENSG00000134184	GSTM1	10.23885357	0.000847851
ENSG00000134258	VTCN1	7.100799986	0.033633179
ENSG00000134489	HRH4	21.73631685	2.78E-10
ENSG00000134490	TMEM241	4.003731712	0.039002989
ENSG00000135045	C9orf40	6.214602975	0.028846388
ENSG00000135406	PRPH	6.981221213	0.014803944
ENSG00000135678	CPM	6.48495403	0.000288102
ENSG00000135698	MPHOSPH6	5.407618327	0.004842794
ENSG00000136206	SPDYE1	5.61563331	0.02873478
ENSG00000136449	MYCBPAP	8.205247789	0.000338679
ENSG00000136514	RTP4	7.515628021	0.028043048
ENSG00000136573	BLK	6.922948512	0.013357984
ENSG00000136866	ZFP37	6.481149973	0.008064132
ENSG00000136908	DPM2	5.967000292	0.036333502
ENSG00000136931	NR5A1	20.89776979	2.06E-09
ENSG00000137571	SLCO5A1	5.778659159	0.00864343
ENSG00000137691	C11orf70	6.699349315	0.031179688
ENSG00000137747	TMPRSS13	5.617603958	0.003274429
ENSG00000137766	UNC13C	5.474605678	0.045942546
ENSG00000137804	NUSAP1	3.909845732	0.023938144
ENSG00000137843	PAK6	6.385779264	0.034620172
ENSG00000137878	GCOM1	19.74985352	3.02E-07
ENSG00000138303	ASCC1	3.259822464	0.000320281
ENSG00000138798	EGF	7.283270751	0.003666099
ENSG00000139151	PLCZ1	6.770870633	0.038914618
ENSG00000139173	TMEM117	4.912034039	0.010078765
ENSG00000139219	COL2A1	6.039831534	0.019077419
ENSG00000139537	CCDC65	7.631539757	0.013165033
ENSG00000140015	KCNH5	19.54090931	4.31E-07
ENSG00000140478	GOLGA6D	8.483816975	0.019123912
ENSG00000141391	PRELID3A	8.59964678	0.001600426
ENSG00000141485	SLC13A5	7.907112494	0.002856289
ENSG00000141642	ELAC1	6.424515425	0.029032844
ENSG00000142619	PADI3	22.23518987	3.13E-17
ENSG00000143217	NECTIN4	2.551872785	0.029166793
ENSG00000143412	ANXA9	7.642945649	0.016174932
ENSG00000143498	TAF1A	4.533776674	0.00423713
ENSG00000143520	FLG2	8.15700848	0.000482182
ENSG00000143614	GATAD2B	3.555060808	0.023429376
ENSG00000143702	CEP170	4.52793599	3.71E-06
ENSG00000143851	PTPN7	6.860157107	0.000167808
ENSG00000143921	ABCG8	8.075184945	0.019819095
ENSG00000144045	DQX1	6.93398109	0.023486655
ENSG00000144285	SCN1A	6.960834224	0.020375716
ENSG00000144290	SLC4A10	8.623137059	0.00423713
ENSG00000144406	UNC80	7.481783511	0.017799601
ENSG00000144550	CPNE9	6.621531221	0.037380171
ENSG00000144847	IGSF11	7.732713307	0.04924726
ENSG00000144852	NR1I2	7.764380781	0.012283125
ENSG00000145416	01-Mar	8.158636923	0.001222003
ENSG00000145850	TIMD4	21.35961637	1.53E-09
ENSG00000145882	PCYOX1L	6.998031839	0.00848083
ENSG00000145911	N4BP3	6.951467944	0.004247312
ENSG00000146013	GFRA3	7.554428926	0.038837427
ENSG00000146109	ABT1	6.717959844	0.019087327
ENSG00000146147	MLIP	5.375625777	0.020375716
ENSG00000146216	TTBK1	7.057766974	0.019711028
ENSG00000146410	MTFR2	5.724261746	0.012643152
ENSG00000146416	AIG1	6.082062251	0.000127987
ENSG00000147082	CCNB3	22.34146914	2.83E-09
ENSG00000147127	RAB41	18.58373921	2.30E-06
ENSG00000147155	EBP	6.661512492	6.21E-10
ENSG00000147383	NSDHL	3.901296384	0.0385205
ENSG00000148426	PROSER2	7.430268986	0.004324849
ENSG00000148688	RPP30	2.794415927	0.042706244
ENSG00000149043	SYT8	7.069522043	0.007949913
ENSG00000149743	TRPT1	7.250548055	3.63E-05
ENSG00000149922	TBX6	7.531837726	0.005646695
ENSG00000150361	KLHL1	22.27849643	3.61E-10
ENSG00000150433	TMEM218	4.839933841	0.037570405
ENSG00000150967	ABCB9	6.532738502	0.000177448
ENSG00000151881	TMEM267	7.763899555	2.30E-07
ENSG00000151952	TMEM132D	22.85618187	2.22E-10
ENSG00000152076	CCDC74B	4.909565704	0.011987602
ENSG00000152439	ZNF773	5.842645514	0.015288045
ENSG00000152591	DSPP	8.826256319	0.001083592
ENSG00000152705	CATSPER3	22.37668645	6.45E-10
ENSG00000152766	ANKRD22	6.862936136	0.021287263
ENSG00000152822	GRM1	8.111736369	0.00523281
ENSG00000152969	JAKMIP1	6.378649003	0.004437358
ENSG00000153879	CEBPG	7.025494992	1.69E-05
ENSG00000154027	AK5	5.0423391	0.049178477
ENSG00000154646	TMPRSS15	23.41562426	4.02E-13
ENSG00000154920	EME1	8.615663751	0.000225117
ENSG00000154928	EPHB1	6.44031854	0.000937535
ENSG00000155269	GPR78	7.577017777	0.027661114
ENSG00000155329	ZCCHC10	5.752065468	1.57E-05
ENSG00000155511	GRIA1	7.132106687	0.00397684
ENSG00000155636	RBM45	7.044714552	0.000190719
ENSG00000155659	VSIG4	7.469704352	0.005646695
ENSG00000155754	ALS2CR11	5.572216852	0.007679819
ENSG00000156170	NDUFAF6	3.543600252	0.026278687
ENSG00000156265	MAP3K7CL	7.075658074	0.001076919
ENSG00000156504	FAM122B	2.110179739	0.020959146
ENSG00000156920	ADGRG4	5.504597306	0.016168502
ENSG00000157060	SHCBP1L	6.489523542	0.02682855
ENSG00000157131	C8A	24.24364938	1.14E-13
ENSG00000157303	SUSD3	7.487381511	0.029166793
ENSG00000157322	CLEC18A	20.9028258	1.53E-09
ENSG00000157326	DHRS4	6.789223637	0.00416484
ENSG00000158042	MRPL17	4.137564558	0.03161137
ENSG00000158055	GRHL3	4.138602974	0.038598822
ENSG00000158113	LRRC43	7.818238019	0.001344442
ENSG00000158156	XKR8	6.730104447	0.041938486
ENSG00000158246	FAM46B	7.132732925	0.00423713
ENSG00000158402	CDC25C	4.141023171	0.003670429
ENSG00000158423	RIBC1	8.646373332	0.000354002
ENSG00000158445	KCNB1	6.608673533	0.043744072
ENSG00000158560	DYNC1I1	5.312293148	0.03706094
ENSG00000158571	PFKFB1	5.436505086	0.039445062
ENSG00000159217	IGF2BP1	7.652323622	0.004274975
ENSG00000159248	GJD2	19.66909867	3.50E-07
ENSG00000159650	UROC1	6.76161044	0.031710731
ENSG00000159885	ZNF222	8.037542968	0.006682893
ENSG00000160051	IQCC	7.102901118	0.008817708
ENSG00000160606	TLCD1	7.894768826	0.001319082
ENSG00000161133	USP41	7.132293739	0.022523245
ENSG00000161270	NPHS1	6.915661479	0.01121468
ENSG00000161944	ASGR2	22.14559136	3.18E-10
ENSG00000162241	SLC25A45	4.939007925	0.043401172
ENSG00000162594	IL23R	6.116568102	0.034551543
ENSG00000162636	FAM102B	3.671006828	0.022602699
ENSG00000162817	C1orf115	21.80887594	4.38E-10
ENSG00000162878	PKDCC	4.905870087	0.021410661
ENSG00000162881	OXER1	22.4738257	3.83E-16
ENSG00000162959	MEMO1	3.234064897	0.043282072
ENSG00000163009	C2orf48	7.173122972	0.026802729
ENSG00000163013	FBXO41	7.774133582	1.00E-06
ENSG00000163218	PGLYRP4	22.38156797	1.18E-13
ENSG00000163554	SPTA1	6.258401354	0.042706244
ENSG00000163803	PLB1	4.213370891	0.047095049
ENSG00000163840	DTX3L	2.988889197	0.015826189
ENSG00000164087	POC1A	9.037173053	7.46E-05
ENSG00000164089	ETNPPL	21.48052136	2.06E-10
ENSG00000164211	STARD4	3.150259743	0.045270929
ENSG00000164287	CDC20B	21.70350881	1.85E-10
ENSG00000164296	TIGD6	6.213054121	0.031205287
ENSG00000164338	UTP15	3.904749322	4.64E-05
ENSG00000164362	TERT	9.413428157	3.51E-05
ENSG00000164776	PHKG1	7.532365866	0.024885266
ENSG00000164850	GPER1	6.025102522	0.024461719
ENSG00000165475	CRYL1	6.02452895	0.000884728
ENSG00000165478	HEPACAM	22.74306421	1.45E-09
ENSG00000165480	SKA3	6.038793625	0.005394477
ENSG00000165695	AK8	7.904068385	0.009232953
ENSG00000165832	TRUB1	3.835519897	0.013041351
ENSG00000165874	FAM35BP	3.36367989	0.019712222
ENSG00000165923	AGBL2	6.641547233	0.009747463
ENSG00000165949	IFI27	9.633503208	0.006626136
ENSG00000166104	RP11-299H22.3	6.717587605	0.035409267
ENSG00000166106	ADAMTS15	6.47309191	0.013920056
ENSG00000166123	GPT2	8.017165579	6.24E-06
ENSG00000166342	NETO1	7.549752155	0.017512292
ENSG00000166349	RAG1	23.13049826	7.13E-16
ENSG00000166851	PLK1	4.113895828	0.022288377
ENSG00000166896	ATP23	20.81087559	4.80E-08
ENSG00000166947	EPB42	9.286189127	0.001275999
ENSG00000167065	DUSP18	7.72912317	0.002557426
ENSG00000167077	MEI1	4.662325125	0.047640825
ENSG00000167083	GNGT2	20.63080901	6.10E-08
ENSG00000167130	DOLPP1	7.531853299	0.014661069
ENSG00000167136	ENDOG	8.221746441	0.003278325
ENSG00000167210	LOXHD1	7.108275316	0.001355155
ENSG00000167325	RRM1	2.154595184	0.025112345
ENSG00000167525	PROCA1	6.741108643	0.017914745
ENSG00000167588	GPD1	7.898110063	0.018999716
ENSG00000167772	ANGPTL4	5.043531485	0.015001816
ENSG00000167840	ZNF232	4.594096874	0.016637462
ENSG00000167850	CD300C	7.378888193	0.004327999
ENSG00000168356	SCN11A	8.482327429	0.000875587
ENSG00000168454	TXNDC2	6.978042668	0.019123912
ENSG00000168569	TMEM223	8.165713435	0.000821681
ENSG00000168658	VWA3B	6.365370888	0.013029028
ENSG00000169019	COMMD8	8.103231652	0.013920056
ENSG00000169612	FAM103A1	6.165520014	0.011559532
ENSG00000169684	CHRNA5	6.828791806	0.035606424
ENSG00000169933	FRMPD4	8.186763396	0.004704509
ENSG00000169951	ZNF764	6.082547139	0.001220876
ENSG00000169972	PUSL1	6.851880319	0.016637462
ENSG00000170006	TMEM154	4.612662999	0.012883634
ENSG00000170054	SERPINA9	22.69669106	1.66E-12
ENSG00000170075	GPR37L1	21.07582864	3.02E-08
ENSG00000170180	GYPA	22.61889318	1.76E-09
ENSG00000170191	NANP	6.729788957	0.004766936
ENSG00000170423	KRT78	7.51368107	0.028452948
ENSG00000170473	PYM1	3.835824514	0.036664873
ENSG00000170482	SLC23A1	7.516973874	0.027407331
ENSG00000170537	TMC7	9.307120439	2.28E-10
ENSG00000170579	DLGAP1	8.012629612	0.000227161
ENSG00000170703	TTLL6	7.895478992	0.038914618
ENSG00000170893	TRH	20.72120523	5.36E-08
ENSG00000171094	ALK	7.300178836	0.003322825
ENSG00000171169	NAIF1	21.82178429	7.63E-09
ENSG00000171303	KCNK3	6.103489094	0.028450909
ENSG00000171403	KRT9	8.920009533	0.000150767
ENSG00000171495	MROH2B	21.87161851	3.75E-14
ENSG00000171560	FGA	21.39348091	9.62E-13
ENSG00000171595	DNAI2	23.09010156	3.75E-10
ENSG00000171759	PAH	7.250131179	0.020958951
ENSG00000171815	PCDHB1	20.75593888	5.10E-08
ENSG00000171903	CYP4F11	9.278703631	1.91E-07
ENSG00000172156	CCL11	7.133795184	0.00328021
ENSG00000172380	GNG12	3.792731339	0.029311444
ENSG00000172409	CLP1	5.928248102	0.035145793
ENSG00000172478	C2orf54	7.654450244	0.005246467
ENSG00000172497	ACOT12	7.106026709	0.037202675
ENSG00000172794	RAB37	7.719694858	0.00096573
ENSG00000172840	PDP2	7.809873739	5.20E-05
ENSG00000172867	KRT2	8.667998654	0.002343416
ENSG00000172901	LVRN	7.841028082	0.004704509
ENSG00000173157	ADAMTS20	6.945573322	0.010258796
ENSG00000173432	SAA1	8.780967508	0.0002752
ENSG00000173535	TNFRSF10C	6.344753106	0.031710731
ENSG00000173705	SUSD5	6.818409435	0.037236559
ENSG00000173727	CMB9-22P13.1	20.67198695	5.80E-08
ENSG00000173805	HAP1	5.721533794	0.037916026
ENSG00000174226	SNX31	7.282847626	0.017468662
ENSG00000174469	CNTNAP2	22.30639383	3.27E-12
ENSG00000174740	PABPC5	6.377375814	0.032987415
ENSG00000174898	CATSPERD	6.344704603	0.029311444
ENSG00000174946	GPR171	7.304913697	0.001627521
ENSG00000175065	DSG4	8.249702326	0.01451539
ENSG00000175110	MRPS22	3.053053461	5.68E-05
ENSG00000175544	CABP4	6.148475151	0.030567495
ENSG00000175548	ALG10B	4.145765817	0.034227362
ENSG00000175634	RPS6KB2	2.926486884	0.006908766
ENSG00000175643	RMI2	6.519603218	0.019077419
ENSG00000175730	BAK1P1	6.345892422	0.014162318
ENSG00000176054	RPL23P2	7.151718156	0.005236122
ENSG00000176406	RIMS2	6.873955382	4.34E-06
ENSG00000176444	CLK2	6.433432438	0.000610344
ENSG00000176731	C8orf59	3.738234124	0.024885266
ENSG00000176927	EFCAB5	8.069192203	0.008835651
ENSG00000177191	B3GNT8	22.2778516	9.51E-13
ENSG00000177383	MAGEF1	4.633453646	0.020267198
ENSG00000177455	CD19	7.429653193	0.019877936
ENSG00000177602	GSG2	7.805299498	0.001311499
ENSG00000177854	TMEM187	22.00258492	1.97E-15
ENSG00000178150	ZNF114	6.402152771	0.019397178
ENSG00000178229	ZNF543	3.858693255	0.033748817
ENSG00000178934	LGALS7B	7.160117728	0.037380171
ENSG00000178997	EXD1	7.526304609	0.032877705
ENSG00000179044	EXOC3L1	7.134743399	0.000417397
ENSG00000179057	IGSF22	21.09374899	2.94E-08
ENSG00000179271	GADD45GIP1	4.565457202	0.038532243
ENSG00000179630	LACC1	7.376916791	0.000181563
ENSG00000180176	TH	6.900482195	0.029311444
ENSG00000180340	FZD2	6.331898236	0.011559532
ENSG00000180638	SLC47A2	8.348972634	0.00186863
ENSG00000180999	C1orf105	21.5158416	1.36E-08
ENSG00000181004	BBS12	6.997561998	0.000258269
ENSG00000181035	SLC25A42	7.808520753	1.47E-05
ENSG00000181218	HIST3H2A	6.646397383	0.011701833
ENSG00000181355	OFCC1	7.793546846	0.005859406
ENSG00000181847	TIGIT	8.173032926	0.007667486
ENSG00000181852	RNF41	3.261104508	0.037380171
ENSG00000182256	GABRG3	8.872575084	0.012422443
ENSG00000182400	TRAPPC6B	4.570980196	5.06E-08
ENSG00000182405	PGBD4	6.856625115	0.042035849
ENSG00000182447	OTOL1	21.45915034	5.33E-10
ENSG00000182489	XKRX	7.984349493	0.00105061
ENSG00000183077	AFMID	2.987948614	0.027661114
ENSG00000183111	ARHGEF37	6.266854919	3.98E-05
ENSG00000183117	CSMD1	7.358136082	0.010181663
ENSG00000183214	MICA	7.218586918	0.029492072
ENSG00000183662	FAM19A1	21.79139931	3.64E-10
ENSG00000183840	GPR39	7.855088799	0.011559532
ENSG00000183891	TTC32	5.869304911	0.021410661
ENSG00000184270	HIST2H2AB	4.679807901	0.017986213
ENSG00000185085	INTS5	5.177994375	0.000679435
ENSG00000185565	LSAMP	7.225800689	0.001147523
ENSG00000185958	FAM186A	6.933395213	0.02317811
ENSG00000186191	BPIFB4	7.896294478	0.015104831
ENSG00000186301	MST1P2	8.240942224	1.73E-05
ENSG00000186442	KRT3	8.040834968	0.001870566
ENSG00000186642	PDE2A	3.132429257	0.030264188
ENSG00000186648	CARMIL3	6.150881119	0.020959146
ENSG00000186665	C17orf58	6.935386317	0.000142232
ENSG00000186743	TPI1P3	5.32930597	0.027166798
ENSG00000186871	ERCC6L	5.55418632	0.046363189
ENSG00000187140	FOXD3	21.68515921	3.01E-09
ENSG00000187243	MAGED4B	3.878800046	0.041206509
ENSG00000187607	ZNF286A	5.320514679	0.022523245
ENSG00000187713	TMEM203	7.135765422	0.021561978
ENSG00000187715	KBTBD12	7.582364675	0.010116863
ENSG00000187726	DNAJB13	20.80149367	4.84E-08
ENSG00000187812	RP11-24M17.5	24.07980694	1.89E-16
ENSG00000187833	C2orf78	20.95693663	3.66E-08
ENSG00000187912	CLEC17A	22.59400008	1.27E-15
ENSG00000187952	HS6ST1P1	6.393242128	0.000773273
ENSG00000187961	KLHL17	4.903038811	0.006626136
ENSG00000187984	ANKRD19P	7.726905643	0.005009377
ENSG00000188004	C1orf204	21.03408027	3.22E-08
ENSG00000188010	MORN2	7.947340047	0.000328995
ENSG00000188037	CLCN1	9.47891102	1.79E-06
ENSG00000188107	EYS	6.682777044	0.003071151
ENSG00000188372	ZP3	7.096382256	0.000104868
ENSG00000188388	GOLGA6L3	3.780448426	0.030672684
ENSG00000188393	CLEC2A	23.12224091	6.73E-10
ENSG00000188428	BLOC1S5	6.981334644	0.029876925
ENSG00000188647	PTAR1	2.686794328	0.004704509
ENSG00000188672	RHCE	21.26378381	1.78E-09
ENSG00000188707	ZBED6CL	6.214738428	0.009139859
ENSG00000188779	SKOR1	6.032497856	0.02351884
ENSG00000188827	SLX4	2.907178352	0.007568627
ENSG00000188848	BEND4	21.7552547	8.64E-09
ENSG00000188878	FBF1	4.148858825	0.026762741
ENSG00000189064	GAGE2A	22.00520045	2.42E-15
ENSG00000189149	CRYM-AS1	5.980173344	0.038532243
ENSG00000189280	GJB5	8.202101463	0.000606378
ENSG00000189298	ZKSCAN3	7.465384885	0.000181563
ENSG00000196101	HLA-DRB3	5.951473422	0.021410661
ENSG00000196169	KIF19	8.031698909	0.003713575
ENSG00000196277	GRM7	5.474051649	0.037406765
ENSG00000196417	ZNF765	3.818156045	0.019712222
ENSG00000196437	ZNF569	7.226488279	0.000568551
ENSG00000196872	KIAA1211L	3.607323713	0.025671219
ENSG00000196976	LAGE3	6.664093474	0.011701833
ENSG00000197279	ZNF165	4.325605133	0.035227932
ENSG00000197385	ZNF860	5.328619343	2.98E-05
ENSG00000197620	CXorf40A	6.218400123	0.013357984
ENSG00000197651	CCER1	7.731351513	0.001088903
ENSG00000197653	DNAH10	7.791886588	0.007628202
ENSG00000197696	NMB	7.002455222	0.011104736
ENSG00000197748	CFAP43	4.821237673	0.036333502
ENSG00000197860	SGTB	8.749256086	1.48E-06
ENSG00000197891	SLC22A12	20.60640261	6.38E-08
ENSG00000197893	NRAP	5.944816727	0.017439686
ENSG00000197915	HRNR	6.822177153	0.022088397
ENSG00000197978	GOLGA6L9	4.330815049	0.011104736
ENSG00000198062	POTEH	22.15517128	6.62E-10
ENSG00000198155	ZNF876P	4.625241903	0.028620691
ENSG00000198216	CACNA1E	8.398034183	6.16E-05
ENSG00000198585	NUDT16	5.650626518	0.013871661
ENSG00000198597	ZNF536	7.173013979	0.009770457
ENSG00000198670	LPA	9.396688244	5.09E-06
ENSG00000198680	TUSC1	6.51607841	0.014131235
ENSG00000198715	GLMP	3.352082711	0.015452168
ENSG00000198736	MSRB1	8.182007648	0.000141725
ENSG00000198759	EGFL6	4.917798577	0.044047003
ENSG00000198923	RP11-290L1.7	20.76466356	5.06E-08
ENSG00000200237	SNORA70	6.96643591	0.000681072
ENSG00000200564	SNORD115-39	21.19266834	2.55E-08
ENSG00000200795	RNU4-1	3.846848881	0.038837427
ENSG00000203780	FANK1	5.910398489	0.027407331
ENSG00000203852	HIST2H3A	5.225812338	0.003666099
ENSG00000203923	SPANXN1	20.65310027	5.96E-08
ENSG00000204065	TCEAL5	9.00511131	5.95E-06
ENSG00000204086	RPA4	7.877944601	0.034620172
ENSG00000204789	ZNF204P	5.527449646	0.033194809
ENSG00000204790	BX255923.2	8.353007691	0.000569366
ENSG00000204822	MRPL53	7.57769233	0.001421703
ENSG00000205078	SYCE1L	6.114055297	0.01336607
ENSG00000205482	SPDYE18	22.3713772	8.68E-16
ENSG00000205592	MUC19	4.814003969	0.019225311
ENSG00000205809	KLRC2	21.67994655	6.67E-13
ENSG00000205857	NANOGNB	20.7940353	4.87E-08
ENSG00000205918	PDPK2P	5.256725453	0.000226787
ENSG00000206043	C18orf63	21.42295014	2.52E-10
ENSG00000206450	HLA-B	2.853718093	0.012302985
ENSG00000206579	XKR4	21.62244729	1.97E-10
ENSG00000208028	MIR616	24.26522259	7.43E-16
ENSG00000211593	IGKJ5	8.452769038	0.000883369
ENSG00000211941	IGHV3-11	22.31078153	1.14E-13
ENSG00000212829	RPS26P3	4.428111977	0.031986483
ENSG00000213005	PTTG3P	6.538133837	0.000583577
ENSG00000213139	CRYGS	6.946997266	0.012478536
ENSG00000213155	RP11-252O18.3	20.31944767	1.10E-07
ENSG00000213157	RP11-259P15.1	5.156972354	0.034551543
ENSG00000213239	NPM1P32	4.612837384	0.037202675
ENSG00000213331	RP11-713C19.2	6.191691095	0.036333502
ENSG00000213399	AC022210.2	3.967273383	0.021015512
ENSG00000213420	GPC2	7.586773414	0.003071151
ENSG00000213695	RPS7P14	8.425012356	0.007085386
ENSG00000213889	PPM1N	5.583780624	0.038532243
ENSG00000214203	RPS4XP1	3.916650948	0.003572581
ENSG00000214211	CTAGE14P	6.502115358	0.024885266
ENSG00000214290	COLCA2	7.875919621	0.015154669
ENSG00000214300	SPDYE3	22.04941669	1.89E-16
ENSG00000214424	FAM149B1P1	4.896306238	0.045942546
ENSG00000214425	LRRC37A4P	3.683145368	0.049284431
ENSG00000214558	RP11-74E24.2	2.713266692	0.027661114
ENSG00000214842	RAD51AP2	8.272852323	0.006626136
ENSG00000215186	GOLGA6B	10.40630716	0.003056895
ENSG00000215274	GAGE10	8.172092122	0.00640545
ENSG00000215424	MCM3AP-AS1	7.349365661	0.033790322
ENSG00000215548	FRG1JP	4.959739088	0.037380171
ENSG00000215559	ANKRD20A11P	4.773138003	0.013915865
ENSG00000215630	GUSBP9	7.581328547	0.022213148
ENSG00000216624	GAPDHP72	4.262440808	0.02756419
ENSG00000216866	RPS2P55	2.618126182	0.03607601
ENSG00000217643	PTGES3P2	5.770801709	0.008817708
ENSG00000218672	AC008060.7	20.65561179	5.96E-08
ENSG00000218996	RP1-99E18.2	6.144397315	0.03058511
ENSG00000220248	ZNF402P	4.925391015	0.044047003
ENSG00000220695	RP1-121G13.3	4.953565618	0.016966756
ENSG00000221063	MIR1296	5.093275581	0.027661114
ENSG00000221926	TRIM16	5.427049258	0.014278168
ENSG00000223416	RPS26P15	6.956025061	0.004274975
ENSG00000223804	CH17-472G23.2	5.380080604	0.017439686
ENSG00000224126	UBE2SP2	5.026084499	0.034227362
ENSG00000224208	AL590762.6	5.431573509	0.016373126
ENSG00000224697	NEFMP1	6.819062229	0.044038785
ENSG00000224971	SUMO2P3	4.504192664	0.024885266
ENSG00000225715	RP11-325E14.5	5.865036011	0.02873478
ENSG00000225880	LINC00115	5.827911217	0.017227001
ENSG00000226124	FTCDNL1	21.46893666	1.40E-10
ENSG00000226137	BAIAP2-AS1	8.045020859	0.001627521
ENSG00000226430	USP17L7	22.1757767	3.85E-09
ENSG00000226650	KIF4B	5.767438924	0.007523804
ENSG00000226763	SRRM5	23.10895334	1.92E-13
ENSG00000227620	ALG1L8P	21.43731216	2.22E-09
ENSG00000228157	AC007952.5	9.247163931	0.012536818
ENSG00000228169	PPIAP19	3.691029133	0.025629599
ENSG00000228510	RP11-339B21.8	5.942515871	0.023218629
ENSG00000229186	ADAM1A	5.766050394	0.008479728
ENSG00000229241	PNPT1P1	4.379809086	0.042706244
ENSG00000229242	RP5-1111A8.3	22.39557963	2.59E-09
ENSG00000229817	RP11-78H18.2	5.951600036	0.006963004
ENSG00000229894	RP11-668G10.2	6.212854764	0.027420101
ENSG00000229897	SEPT7P7	6.694042372	0.037833235
ENSG00000230592	RPSAP8	5.387562595	0.002163828
ENSG00000230847	RP11-195E2.1	21.34344712	8.31E-16
ENSG00000230956	RP3-452M16.1	5.983448138	0.001344442
ENSG00000231579	RPL7P21	6.759121541	0.028811812
ENSG00000231707	PABPC1P1	3.437287445	0.019712222
ENSG00000232150	ST13P4	4.563811344	0.004149476
ENSG00000232883	RP11-302I18.1	4.393785664	0.031907246
ENSG00000232916	HMGN2P27	5.374781309	0.038669566
ENSG00000233111	RAB1C	3.982077784	0.039043867
ENSG00000233786	CDC27P1	4.866086379	0.011115093
ENSG00000233971	RPS20P10	3.255159527	0.021410661
ENSG00000234513	AC073072.7	6.376504222	0.007200692
ENSG00000235036	RP5-1099D15.1	5.155214886	0.015791264
ENSG00000235095	RP11-1217F2.1	3.244432821	0.023903927
ENSG00000235381	RP11-477D19.2	6.38775067	0.044035474
ENSG00000235512	TAB3-AS2	21.93653205	6.17E-09
ENSG00000235847	LDHAP7	2.409104954	0.048419389
ENSG00000236439	RP11-175B9.3	2.540325656	0.014661069
ENSG00000236761	CTAGE9	6.40193993	0.000480017
ENSG00000236830	CBR3-AS1	7.749437953	0.000838641
ENSG00000236852	RP11-3D23.1	4.60201425	0.032260553
ENSG00000237415	NRBF2P3	5.749827598	0.027420101
ENSG00000237470	DCLRE1CP1	23.01092002	7.25E-13
ENSG00000237758	BANF1P3	3.510242043	0.037380171
ENSG00000237804	HNRNPA1P39	4.985487421	2.33E-05
ENSG00000237973	MTCO1P12	3.359572607	0.02682855
ENSG00000238000	RP11-274E7.2	4.679373179	0.015104831
ENSG00000238085	RP11-435F13.2	5.571419171	0.047804976
ENSG00000238105	GOLGA2P5	4.484404798	0.037380171
ENSG00000238222	MKRN4P	4.723339701	0.042268489
ENSG00000239906	RP11-34P13.14	20.84342692	4.55E-08
ENSG00000240132	ETF1P2	6.256559864	0.004790036
ENSG00000240854	RP11-64K7.1	5.092200455	0.01497453
ENSG00000241186	TDGF1	21.69629043	9.53E-09
ENSG00000241394	HLA-DMA	23.0381671	2.30E-15
ENSG00000241464	RPL39P38	6.603822904	0.031907246
ENSG00000242060	RPS3AP49	3.278250787	0.027126957
ENSG00000242705	ICE2P2	6.607512642	0.032877705
ENSG00000243279	PRAF2	7.237797009	0.024331975
ENSG00000243290	IGKV1-12	19.54084135	4.31E-07
ENSG00000243918	EIF4BP8	5.173973661	0.028450909
ENSG00000244151	RP11-148K1.12	21.74435214	2.67E-12
ENSG00000244229	RPL26P35	4.678891369	0.045942546
ENSG00000244607	CCDC13	6.489433553	0.016966756
ENSG00000244693	CTAGE8	5.139977579	0.006569208
ENSG00000247556	OIP5-AS1	4.334970651	0.037380171
ENSG00000248476	BACH1-IT1	23.31748733	1.14E-16
ENSG00000248546	ANP32C	4.871816404	0.002092203
ENSG00000248873	SERBP1P6	4.093132363	0.01900177
ENSG00000249210	GAPDHP38	5.121568206	0.003551779
ENSG00000249471	ZNF324B	7.847370507	0.007288964
ENSG00000249485	RBBP4P1	3.687136598	0.005061223
ENSG00000250111	AC107982.4	5.226563758	0.014661069
ENSG00000250138	RP11-848G14.5	8.801228145	0.00137797
ENSG00000250346	EEF1GP2	5.38204586	0.001600426
ENSG00000250959	GLUD1P3	3.43570638	0.037380171
ENSG00000251039	IGKV2D-40	7.286057756	0.036664873
ENSG00000251211	RP11-889L3.4	6.926526879	0.005679143
ENSG00000251571	DDX3P3	5.515886873	0.025719027
ENSG00000251634	RP11-1280N14.3	3.521156705	0.011104736
ENSG00000251664	PCDHA12	21.87334663	2.62E-11
ENSG00000252712	SCARNA14	6.225791363	0.032877705
ENSG00000253570	RNF5P1	5.847568001	0.016454354
ENSG00000253893	FAM85B	6.775115986	0.027126957
ENSG00000254764	TRIM53CP	19.85283503	2.54E-07
ENSG00000255112	CHMP1B	4.505824073	0.005002402
ENSG00000255346	NOX5	7.294439609	0.027407331
ENSG00000255737	AGAP2-AS1	8.246147324	0.00456398
ENSG00000255874	LINC00346	22.66865301	4.53E-13
ENSG00000255883	RP11-79P5.10	5.875524725	0.036613231
ENSG00000256591	RP11-286N22.8	7.14365765	0.013056401
ENSG00000257365	FNTB	7.961674346	0.001070993
ENSG00000257884	RP11-597A11.4	5.910184456	0.001990233
ENSG00000258227	CLEC5A	7.204223741	0.011484101
ENSG00000258461	RP11-164J13.1	7.816763597	3.71E-06
ENSG00000258608	DNAJC19P9	4.568881213	0.038246185
ENSG00000259316	CTD-2116N17.1	6.383558347	0.017125627
ENSG00000259546	RP11-351M8.2	22.25694993	3.29E-09
ENSG00000260097	SPDYE6	5.579583153	0.029166793
ENSG00000261377	PDCD6IPP2	2.978226651	0.02756419
ENSG00000261760	RP11-1223D19.1	4.487231559	0.030598316
ENSG00000263639	MSMB	17.8874451	7.32E-06
ENSG00000263843	RP11-649A18.12	21.17006749	2.64E-08
ENSG00000264424	MYH4	8.689844087	0.001129732
ENSG00000265182	SRP72P1	5.782592144	0.020959146
ENSG00000266066	POLRMTP1	5.396443848	0.017932189
ENSG00000266537	SPDYE22P	23.65948683	4.21E-16
ENSG00000266729	DSG1-AS1	21.13658125	3.61E-10
ENSG00000267060	PTGES3L	21.8166884	7.25E-13
ENSG00000267691	SHC1P2	5.849591689	0.009741669
ENSG00000267796	LIN37	5.313929702	0.006626136
ENSG00000268120	CTD-3193O13.11	8.451235384	0.019668801
ENSG00000268895	A1BG-AS1	9.487559492	0.000144646
ENSG00000269318	AC007292.3	19.80550951	2.74E-07
ENSG00000269609	RPARP-AS1	6.033970402	0.035227932
ENSG00000269888	RP11-3P17.5	21.4330869	1.11E-09
ENSG00000271011	RP11-171I2.5	22.34414872	3.41E-16
ENSG00000271754	RP3-337H4.9	22.03134825	1.15E-13
ENSG00000272140	RP11-574K11.29	6.802092134	0.039043867
ENSG00000272419	RP11-403I13.8	4.660404085	0.015826189
ENSG00000272990	RP11-305K5.1	21.42336689	1.62E-08
ENSG00000273756	RP11-566K19.9	6.663465998	0.010256311
ENSG00000274404	GOLGA6L22	9.804798355	2.32E-05
ENSG00000275066	SYNRG	6.883829736	0.000694181
ENSG00000275328	SPDYE19P	7.440822225	0.029109719
ENSG00000276040	SPATA31A7	21.03231524	3.22E-08
ENSG00000276135	FAM27E2	4.746030981	0.005828687
ENSG00000276699	TRAJ36	19.32534728	6.45E-07
ENSG00000277224	HIST1H2BF	4.317702475	0.001076919
ENSG00000278308	NPIPA3	3.388862185	0.03586663
ENSG00000278722	RP11-95F22.1	19.8589463	1.85E-10
ENSG00000278769	CTD-2036P10.5	21.09914748	2.94E-08
ENSG00000278915	AC005609.18	20.73519353	5.26E-08
ENSG00000279159	RP3-394A18.1	5.909366074	0.02682855
ENSG00000279738	RP5-1014D13.2	3.06221848	0.029492072
ENSG00000280248	CTD-2047H16.3	6.077216381	0.044229117
ENSG00000007944	MYLIP	-2.254440999	0.010397969
ENSG00000067840	PDZD4	-4.143627928	0.003708589
ENSG00000083896	YTHDC1	-3.848864073	0.012643152
ENSG00000090776	EFNB1	-2.923404799	0.036203685
ENSG00000099860	GADD45B	-2.003759686	0.046938508
ENSG00000111276	CDKN1B	-2.704468733	0.038678235
ENSG00000128791	TWSG1	-3.171806931	0.00533768
ENSG00000139194	RBP5	-6.85515163	0.020375716
ENSG00000146535	GNA12	-2.604863506	0.038532243
ENSG00000163884	KLF15	-5.185681426	0.038914618
ENSG00000180764	PIPSL	-2.774827813	0.034551543
ENSG00000196403	OR10D1P	-9.949534664	0.034227362
ENSG00000198853	RUSC2	-2.412484114	0.013883731
ENSG00000205090	TMEM240	-6.298040773	0.010577436
ENSG00000207460	SNORD116-19	-7.445707005	0.019218859
ENSG00000213478	CFL1P2	-5.86530222	0.02351884
ENSG00000233013	FAM157B	-6.000133196	0.011469667
ENSG00000233406	RP11-296A18.5	-4.354917413	0.01900177
ENSG00000233780	HNRNPA1P30	-3.181522991	0.019780675
ENSG00000235508	RPS2P7	-3.264555837	0.017227001
ENSG00000235838	HSP90AB7P	-4.574917977	0.015101283
ENSG00000236375	POU5F1P5	-4.600073789	0.032103422
ENSG00000240356	RPL23AP7	-7.295334824	0.00780211
ENSG00000250076	RP11-141P6.1	-6.3930311	0.000139043
ENSG00000250896	RNPS1P1	-4.573607045	0.000467223
ENSG00000257453	RP11-290L1.3	-7.059244378	0.00125219
