# Supplementary material for: Profiling of Lymphovascular Space Invasion in Cervical Cancer Revealed PI3K/Akt Signaling Pathway Overactivation and Heterogenic Tumor-Immune Microenvironments
Source: Life (Basel). 2023 Dec 14;13(12):2342. doi: 10.3390/life13122342 (PMC10744523; doi:10.3390/life13122342)
Supplement: Supplementary file 1 [file life-13-02342-s001.zip › Supplement S2. 67 LVSI DEGs intersect with IMPAGT gene set.xlsx]

## Sheet: Sheet1
SYMBOL
ACVR1C
ALK
AMH
ATP6V0A4
BAK1
BMP4
C8A
CACNA1E
CACNG4
CAMK2A
CCL11
CCR7
CD19
CEBPG
CHRNA4
CHRNA5
CHRNB4
CNTNAP2
COL2A1
COL9A1
CR2
DYNC1I1
EGF
FGF20
FZD2
GABRG3
GNG12
GNGT2
GRIA1
GRM1
GRM7
GSTM1
GYPA
GYS2
HLA-B
HLA-DMA
HLA-DRB3
HRH4
IGSF11
IL18RAP
IL23R
INHA
KLRC2
KRT9
LAMB4
LBP
MICA
MYH7
NMB
NTS
OPRM1
PAK6
POLR3GL
PTPN7
RAD51
RAG1
RPS6KB2
SGK3
TBX21
TERT
TIGIT
TNFRSF10C
TNN
TNR
TRH
VTCN1
WNT5A
